# Supplementary material for: A pectin-based photoactivated bactericide nanosystem for achieving an improved utilization rate, photostability and targeted delivery of hematoporphyrin
Source: Royal Society of Chemistry journal article supplement (doi:10.1039/d3tb00300k), 2023-01-01
Supplement: d3tb00300k1.pdf [file d3tb00300k1.pdf]

## Support information

### **Pectin-based photoactivated bactericide nanosystem for improved utilization rate, photostability and targeting of hematoporphyrin**

Yun Li<sup>a,c</sup>, Zhi Cai<sup>b\*\*</sup>, Yihua Yin<sup>a,c,\*</sup>, Ying Yi<sup>a,c</sup>, Weiquan Cai<sup>d</sup>, Shengxiang Tao<sup>e</sup>, Mengting Du<sup>a,c</sup>, Jingli Zhang<sup>a</sup>,  
Ruyu Cao<sup>a</sup>, Yijing Luo<sup>a</sup>, Wenjin Xu<sup>a</sup>

<sup>a</sup>School of Chemistry, Chemical Engineering and Life Science, Wuhan University of Technology, Wuhan 430070, PR China

<sup>b</sup>School of Life Science and Technology, Wuhan Polytechnic University, Wuhan 430023, China

<sup>c</sup>Rizhao Biomedicine and New Materials Research Institute Of Wuhan University of Technology, 276826, PR China.

<sup>d</sup>School of Chemistry and Chemical Engineering, Guangzhou University, Guangzhou 510006, PR China

<sup>e</sup>Department of Orthopaedic Trauma and Microsurgery, Zhongnan Hospital of Wuhan University, Wuhan 430071, Hubei Province, China.

---

\*Corresponding author. Telephone number: +8602787749379. Email addresses: yihuayin@aliyun.com (Y. Yin).

\*\*Co-corresponding author. Email addresses: caizjiangnan@126.com (Z. Cai)

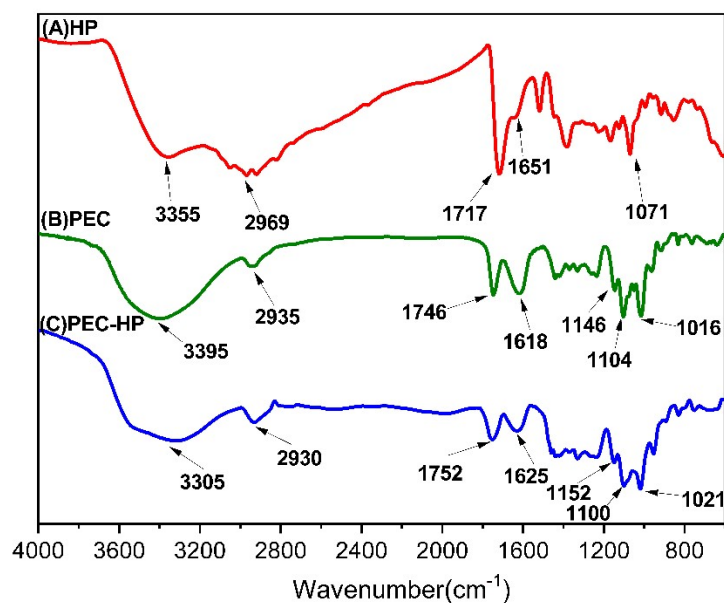

**Fig. SI-1.** FT-IR spectra of HP (A), PEC (B) and PEC-HP conjugates (C).

**Table SI-1** The particle size, PDI, and zeta potential of PEC-HP NPs before and after 30 days

|                  | sample                 | particle size (nm) | PDI           | zeta potential (mV) |
|------------------|------------------------|--------------------|---------------|---------------------|
| before treatment | PEC-HP NP <sub>1</sub> | 377.7 ± 6.40       | 0.195 ± 0.050 | -27.9 ± 0.87        |
|                  | PEC-HP NP <sub>2</sub> | 328.3 ± 2.78       | 0.215 ± 0.009 | -20.1 ± 0.36        |
|                  | PEC-HP NP <sub>3</sub> | 267.4 ± 5.72       | 0.100 ± 0.005 | -19.3 ± 0.60        |
| 30 days storage  | PEC-HP NP <sub>1</sub> | 445.1 ± 5.36       | 0.282 ± 0.005 | -32.1 ± 1.14        |
|                  | PEC-HP NP <sub>2</sub> | 338.1 ± 1.96       | 0.234 ± 0.008 | -21.4 ± 0.53        |
|                  | PEC-HP NP <sub>3</sub> | 271.7 ± 4.05       | 0.115 ± 0.018 | -20.5 ± 1.14        |

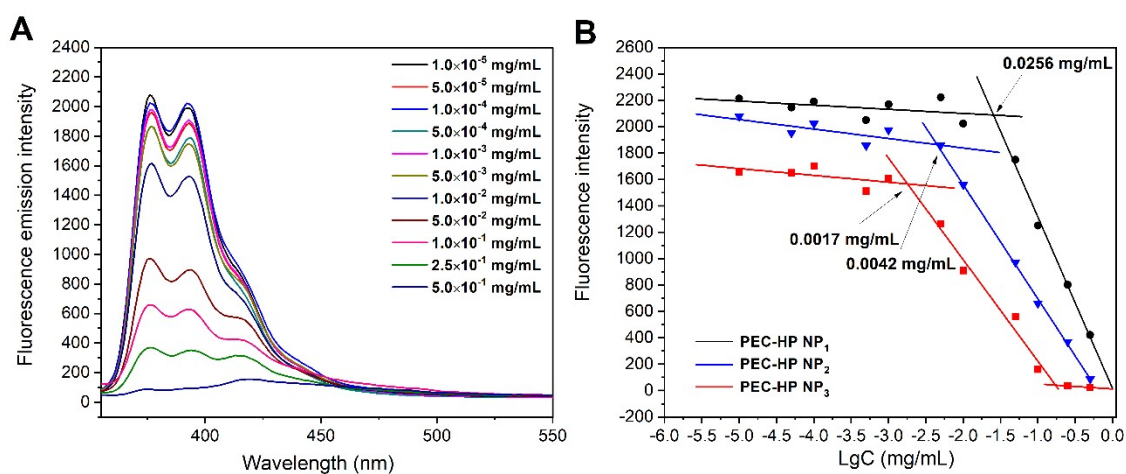

**Fig. SI-2** (A) Fluorescence emission spectra of pyrene at different concentrations of PEC-HP NPs. (B) The plot of fluorescence intensity at 376 nm as a function of the logarithm of concentration.

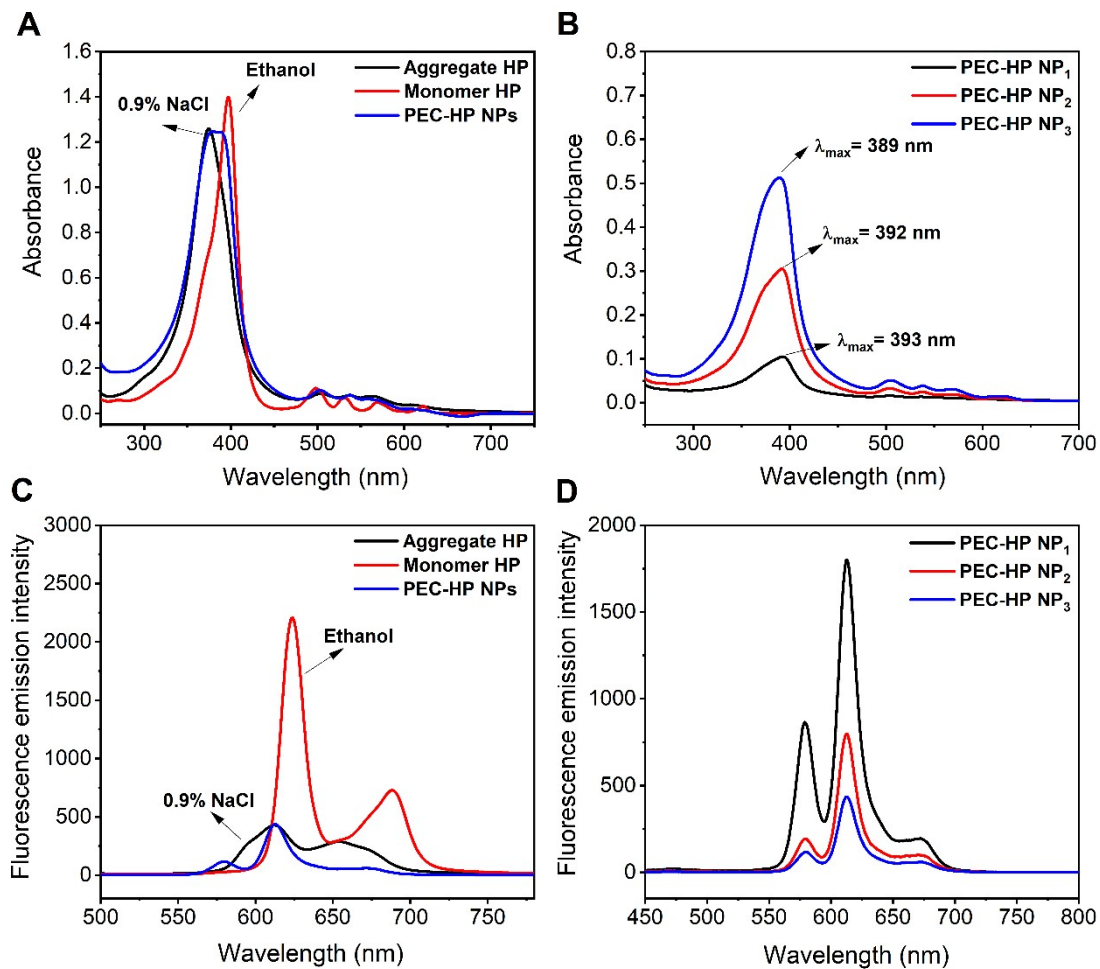

**Fig. SI-3** UV-vis absorption spectra of (A) monomer HP, aggregate HP and PEC-HP NPs and (B) PEC-HP NPs with different grafting rates. Fluorescence emission spectra of (C) monomer HP, aggregate HP and PEC-HP NPs and (D) PEC-HP NPs with different grafting rates.

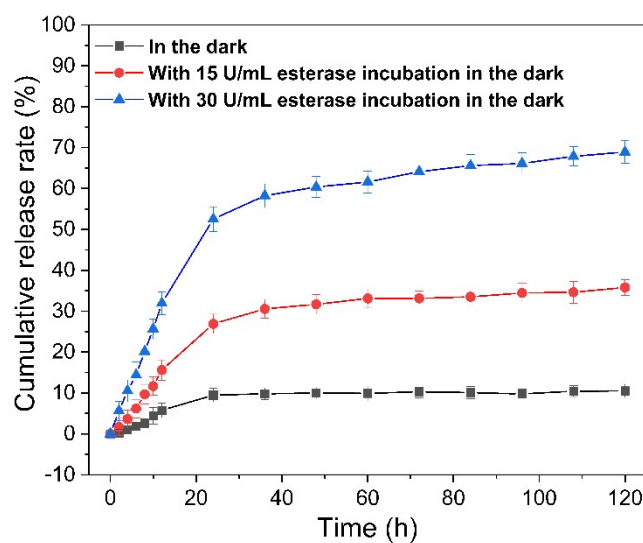

**Fig. SI-4** The cumulative release rate of HP in PEC-HP NPs under different solution conditions.

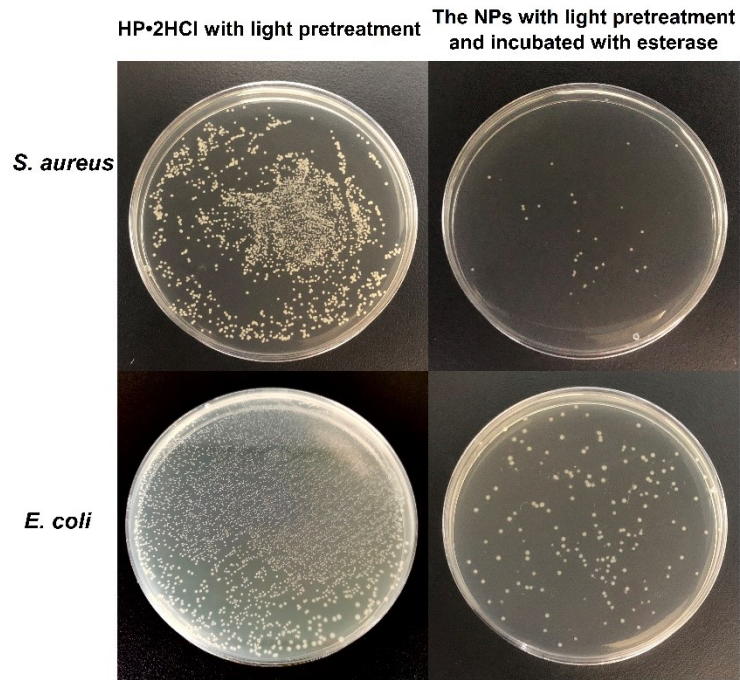

**Fig. SI-5** Colony counts of *S. aureus* and *E. coli* under treatment of NPs with esterase incubation before and after light pretreatment, equal dose of HP•2HCl was used as a control.
